# Supplementary material
Source: Springer Nature journal article supplement (https://www.springermedizin.de/resource/supplementary/12885_2013_4306_MOESM2_ESM.pdf/9467922)
Supplement: MOESM2 [file 9467922]

**Additional file 2. FC values for IPA based experimentally observed mRNA targets of differentially expressed miRNAs in HGSC vs. OSE.**

| mRNAs   | FC values | mRNAs   | FC values | mRNAs   | FC values |
|---------|-----------|---------|-----------|---------|-----------|
| ADCY6   | 1.1       | FHOD1   | 1.1       | PIK3CA  | 1.6       |
| BAP1    | 1.4       | FNDC3A  | -2.5      | PLAG1   | 1.0       |
| BCL2L14 | 1.8       | FOXO1   | -4.3      | PLCG1   | -1.1      |
| CARD11  | 1.6       | FOXO3   | 1.0       | PPM1F   | 1.1       |
| CASP10  | 1.8       | GADD45G | -5.5      | PRKCE   | -1.1      |
| CASP2   | 2.4       | IGF1R   | -1.6      | PTPN13  | -1.7      |
| CD274   | 1.2       | INPPL1  | 2.6       | PTPRD   | -3.6      |
| CDH1    | 6.0       | JAG1    | 1.1       | RARG    | 1.5       |
| CDH4    | -1.2      | KLHL20  | 1.0       | RERE    | 1.3       |
| CDK6    | -1.1      | LRP6    | 1.1       | RPS6KB1 | -1.5      |
| CDKN1B  | -1.7      | MALAT1  | -1.6      | SOS1    | -1.3      |
| CLDN15  | -2.5      | MAP2K1  | 1.3       | SPDEF   | 2.2       |
| CLOCK   | 1.0       | MAP2K4  | -1.2      | TGFB2   | -2.0      |
| COL11A2 | 1.2       | MARCKS  | -1.2      | TUBB    | 1.6       |
| COL4A4  | -2.9      | MED1    | -1.2      | VEGFA   | 5.7       |
| CTBP2   | 1.5       | MITF    | -3.0      | VIM     | -2.5      |
| CTNNB1  | -1.3      | MTSS1   | -1.4      | VWF     | 2.3       |
| CYP1B1  | 2.9       | NCAM1   | -3.1      | WASF3   | -4.6      |
| ELMO2   | 1.3       | NFASC   | -3.8      | WDR37   | -1.0      |
| ERBB2IP | -1.0      | NFIA    | -1.8      | ZEB1    | -3.8      |
| ERBB3   | 20.9      | NLGN2   | 1.1       | ZEB2    | -5.7      |
| ERRFI1  | -3.1      | NTRK3   | 1.1       | ZFPM2   | -4.5      |
| FGFR1   | -1.4      | PGF     | 1.3       |         |           |

The FC (Fold change) values are based on global gene expression analysis [29]. mRNAs with signal values  $<2^5$  are excluded. IPA: Ingenuity Pathway Analysis. HGSC: High-grade serous ovarian carcinoma. OSE: ovarian surface epithelium.
